# Supplementary material for: The Importance of Physical Activity in Preventing Fatigue and Burnout in Healthcare Workers
Source: MDPI journal article supplement (doi:10.3390/healthcare11131915), 2023-07-03
Supplement: s1 [file s1]

**Supplementary Table S3. The result of the cross-tabulation analysis between the educational attainment and motivation for doing sports.**

| <b>Motivation</b>                     | <b>Educational level</b> |                   |             |                    |
|---------------------------------------|--------------------------|-------------------|-------------|--------------------|
| <b>„losing weight to look better”</b> | Primary school           | Vocational school | High school | University/college |
| Primary school                        |                          | p<0.05            | p<0.05      | p<0.05             |
| Vocational school                     | p<0.05                   |                   | p>0.05      | p<0.05             |
| High school                           | p<0.05                   | p>0.05            |             | p>0.05             |
| University/college                    | p<0.05                   | p<0.05            | p>0.05      |                    |

| <b>Motivation</b>                          | <b>Educational level</b> |                   |             |                    |
|--------------------------------------------|--------------------------|-------------------|-------------|--------------------|
| <b>„maintain my health and well-being”</b> | Primary school           | Vocational school | High school | University/college |
| Primary school                             |                          | p<0.001           | p<0.001     | p<0.001            |
| Vocational school                          | p<0.001                  |                   | p<0.001     | p<0.001            |
| High school                                | p<0.001                  | p<0.001           |             | p>0.05             |
| University/college                         | p<0.001                  | p<0.001           | p>0.05      |                    |

| <b>Motivation</b>          | <b>Educational level</b> |                   |             |                    |
|----------------------------|--------------------------|-------------------|-------------|--------------------|
| <b>„it makes me happy”</b> | Primary school           | Vocational school | High school | University/college |
| Primary school             |                          | p<0.001           | p<0.001     | p>0.05             |
| Vocational school          | p<0.001                  |                   | p<0.001     | p<0.001            |
| High school                | p<0.001                  | p<0.001           |             | p<0.001            |
| University/college         | p>0.05                   | p<0.001           | p<0.001     |                    |

| <b>Motivation</b>                                      | <b>Educational level</b> |                   |             |                    |
|--------------------------------------------------------|--------------------------|-------------------|-------------|--------------------|
| <b>„to maintain my condition and become healthier”</b> | Primary school           | Vocational school | High school | University/college |
| Primary school                                         |                          | p<0.001           | p>0.05      | p<0.001            |
| Vocational school                                      | p<0.001                  |                   | p<0.001     | p<0.001            |
| High school                                            | p>0.05                   | p<0.001           |             | p<0.001            |
| University/college                                     | p<0.001                  | p<0.001           | p<0.001     |                    |

| <b>Motivation</b>                                | <b>Educational level</b> |                   |             |                    |
|--------------------------------------------------|--------------------------|-------------------|-------------|--------------------|
| <b>„enjoy spending my free time with others”</b> | Primary school           | Vocational school | High school | University/college |
| Primary school                                   |                          | p<0.05            | p<0.05      | p<0.05             |
| Vocational school                                | p<0.05                   |                   | p>0.05      | p>0.05             |
| High school                                      | p<0.05                   | p>0.05            |             | p>0.05             |
| University/college                               | p<0.05                   | p>0.05            | p>0.05      |                    |

| <b>Motivation</b>                | <b>Educational level</b> |                   |             |                    |
|----------------------------------|--------------------------|-------------------|-------------|--------------------|
| <b>„to feel good in my skin”</b> | Primary school           | Vocational school | High school | University/college |
| Primary school                   |                          | p<0.05            | p<0.05      | p<0.05             |
| Vocational school                | p<0.05                   |                   | p<0.05      | p<0.05             |
| High school                      | p<0.05                   | p<0.05            |             | p>0.05             |
| University/college               | p<0.05                   | p<0.05            | p>0.05      |                    |

| <b>Motivation</b>                       | <b>Educational level</b> |                   |             |                    |
|-----------------------------------------|--------------------------|-------------------|-------------|--------------------|
| <b>„to become attractive to others”</b> | Primary school           | Vocational school | High school | University/college |
| Primary school                          |                          | p<0.05            | p<0.05      | p<0.05             |
| Vocational school                       | p<0.05                   |                   | p<0.05      | p>0.05             |
| High school                             | p<0.05                   | p<0.05            |             | p<0.05             |
| University/college                      | p<0.05                   | p>0.05            | p<0.05      |                    |

| <b>Motivation</b>                        | <b>Educational level</b> |                   |             |                    |
|------------------------------------------|--------------------------|-------------------|-------------|--------------------|
| <b>„my friends expect me to do this”</b> | Primary school           | Vocational school | High school | University/college |
| Primary school                           |                          | p<0.001           | p<0.001     | p<0.001            |
| Vocational school                        | p<0.001                  |                   | p>0.05      | p>0.05             |
| High school                              | p<0.001                  | p>0.05            |             | p>0.05             |
| University/college                       | p<0.001                  | p>0.05            | p>0.05      |                    |

| <b>Motivation</b>                                | <b>Educational level</b> |                   |             |                    |
|--------------------------------------------------|--------------------------|-------------------|-------------|--------------------|
| <b>„improves my cardiorespiratory endurance”</b> | Primary school           | Vocational school | High school | University/college |
| Primary school                                   |                          | p<0.001           | p<0.001     | p<0.001            |
| Vocational school                                | p<0.001                  |                   | p<0.001     | p<0.001            |
| High school                                      | p<0.001                  | p<0.001           |             | p<0.001            |
| University/college                               | p<0.001                  | p<0.001           | p<0.001     |                    |

| <b>Motivation</b>              | <b>Educational level</b> |                   |             |                    |
|--------------------------------|--------------------------|-------------------|-------------|--------------------|
| <b>„to acquire new skills”</b> | Primary school           | Vocational school | High school | University/college |
| Primary school                 |                          | p<0.05            | p<0.05      | p<0.05             |
| Vocational school              | p<0.05                   |                   | p>0.05      | p<0.05             |
| High school                    | p<0.05                   | p>0.05            |             | p<0.05             |
| University/college             | p<0.05                   | p<0.05            | p<0.05      |                    |

| <b>Motivation</b>                 | <b>Educational level</b> |                   |             |                    |
|-----------------------------------|--------------------------|-------------------|-------------|--------------------|
| <b>„it is a challenge for me”</b> | Primary school           | Vocational school | High school | University/college |
| Primary school                    |                          | p<0.05            | p<0.05      | p<0.05             |
| Vocational school                 | p<0.05                   |                   | p>0.05      | p<0.05             |
| High school                       | p<0.05                   | p>0.05            |             | p<0.05             |
| University/college                | p<0.05                   | p<0.05            | p<0.05      |                    |
