# Supplementary material for: The Importance of Physical Activity in Preventing Fatigue and Burnout in Healthcare Workers
Source: MDPI journal article supplement (doi:10.3390/healthcare11131915), 2023-07-03
Supplement: s1 [file s1]

**Supplementary Table S2. The result of the cross-tabulation analysis between types of sports played and work schedule.**

| <b>Workout in a gym</b> | <b>Work schedule</b> |               |            |
|-------------------------|----------------------|---------------|------------|
|                         | 8-hour shift         | 12-hour shift | Duty shift |
| 8-hour shift            |                      | p>0.05        | p<0.05     |
| 12-hour shift           | p>0.05               |               | p<0.05     |
| Duty shift              | p<0.05               | p<0.05        |            |

| <b>Other</b>  | <b>Work schedule</b> |               |            |
|---------------|----------------------|---------------|------------|
|               | 8-hour shift         | 12-hour shift | Duty shift |
| 8-hour shift  |                      | p<0.001       | p>0.05     |
| 12-hour shift | p<0.001              |               | p<0.001    |
| Duty shift    | p>0.05               | p<0.001       |            |

| <b>Swimming</b> | <b>Work schedule</b> |               |            |
|-----------------|----------------------|---------------|------------|
|                 | 8-hour shift         | 12-hour shift | Duty shift |
| 8-hour shift    |                      | p<0.05        | p>0.05     |
| 12-hour shift   | p<0.05               |               | p<0.05     |
| Duty shift      | p>0.05               | p<0.05        |            |

| <b>Yoga</b>   | <b>Work schedule</b> |               |            |
|---------------|----------------------|---------------|------------|
|               | 8-hour shift         | 12-hour shift | Duty shift |
| 8-hour shift  |                      | p<0.05        | p<0.05     |
| 12-hour shift | p<0.05               |               | p>0.05     |
| Duty shift    | p<0.05               | p>0.05        |            |

| <b>Skiing</b> | <b>Work schedule</b> |               |            |
|---------------|----------------------|---------------|------------|
|               | 8-hour shift         | 12-hour shift | Duty shift |
| 8-hour shift  |                      | p<0.001       | p<0.001    |
| 12-hour shift | p<0.001              |               | p<0.001    |
| Duty shift    | p<0.001              | p<0.001       |            |

| <b>Tennis</b> | <b>Work schedule</b> |               |            |
|---------------|----------------------|---------------|------------|
|               | 8-hour shift         | 12-hour shift | Duty shift |
| 8-hour shift  |                      | p<0.05        | p<0.05     |
| 12-hour shift | p<0.05               |               | p<0.05     |
| Duty shift    | p<0.05               | p<0.05        |            |

| <b>Basketball</b> | <b>Work schedule</b> |               |            |
|-------------------|----------------------|---------------|------------|
|                   | 8-hour shift         | 12-hour shift | Duty shift |
| 8-hour shift      |                      | p<0.05        | p<0.05     |
| 12-hour shift     | p<0.05               |               | p<0.05     |
| Duty shift        | p<0.05               | p<0.05        |            |

| <b>Riding</b> | <b>Work schedule</b> |               |            |
|---------------|----------------------|---------------|------------|
|               | 8-hour shift         | 12-hour shift | Duty shift |
| 8-hour shift  |                      | p>0.05        | p<0.05     |
| 12-hour shift | p>0.05               |               | p<0.05     |
| Duty shift    | p<0.05               | p<0.05        |            |
