# Supplementary material for: The Importance of Physical Activity in Preventing Fatigue and Burnout in Healthcare Workers
Source: MDPI journal article supplement (doi:10.3390/healthcare11131915), 2023-07-03
Supplement: s1 [file s1]

**Supplementary Table S1. The result of the cross-tabulation analysis between the groups sporting with friends and relatives and family status.**

| <b>Sporting with<br/>FRIENDS</b> | <b>Family status</b> |         |         |          |
|----------------------------------|----------------------|---------|---------|----------|
|                                  | Unmarried            | Married | Widow   | Divorced |
| Unmarried                        |                      | p<0.001 | p<0.001 | p<0.001  |
| Married                          | p<0.001              |         | p<0.001 | p>0.05   |
| Widow                            | p<0.001              | p<0.001 |         | p<0.001  |
| Divorced                         | p<0.001              | p>0.05  | p<0.001 |          |

| <b>Sporting with<br/>RELATIVES</b> | <b>Family status</b> |         |        |          |
|------------------------------------|----------------------|---------|--------|----------|
|                                    | Unmarried            | Married | Widow  | Divorced |
| Unmarried                          |                      | p<0.05  | p<0.05 | p<0.05   |
| Married                            | p<0.05               |         | p>0.05 | p>0.05   |
| Widow                              | p<0.05               | p>0.05  |        | p>0.05   |
| Divorced                           | p<0.05               | p>0.05  | p>0.05 |          |
